# Supplementary material
Source: PubMed Central journal article supplement (PMC6309513)

File S2:

All 2-D gels for sperm samples analysed in our experiment are shown below. These comprise 9 gels (8 biological + 1 technical replicates) for *Mytilus edulis* and 11 gels (10 biological + 1 technical replicates) for *M. galloprovincialis* samples.

### ***Mytilus edulis***

SW6

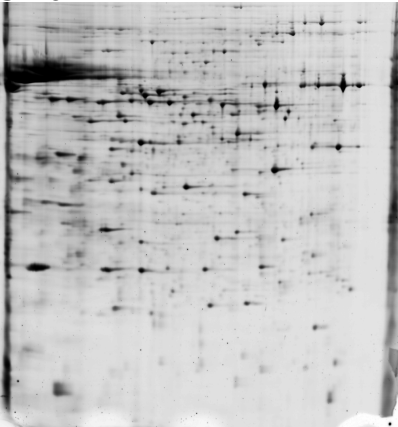

SW10

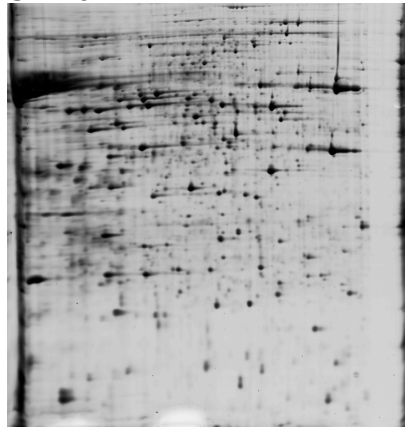

SW14

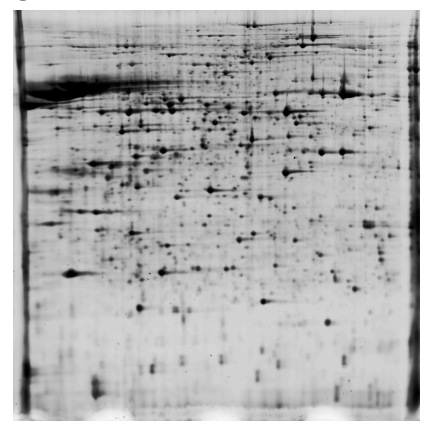

SW14\_REP

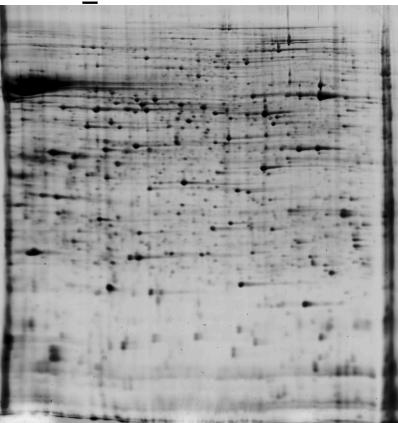

SW15

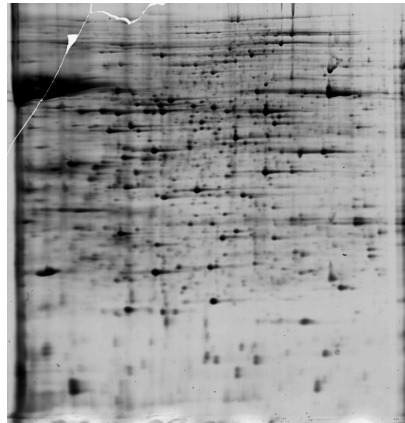

SW16

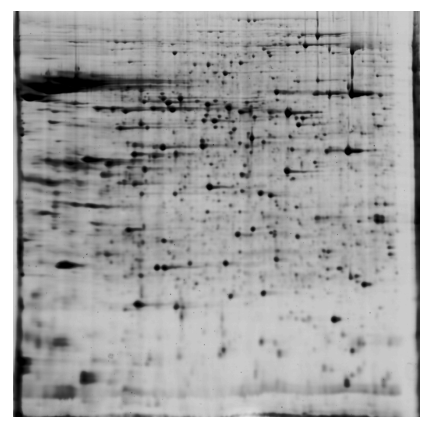

SW18

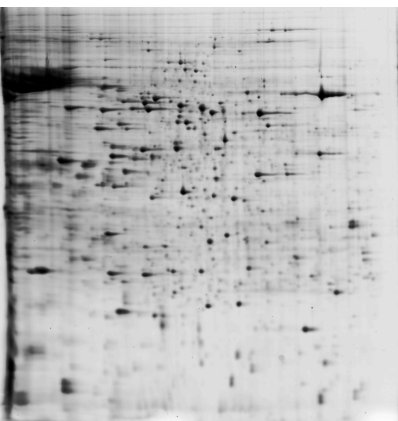

SW19

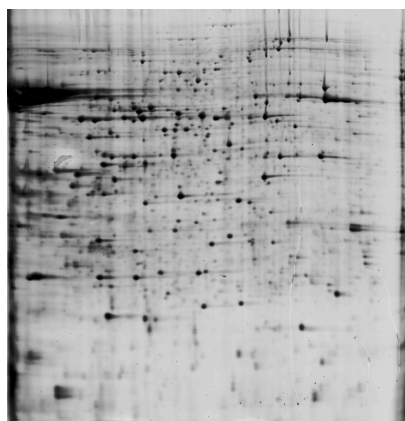

SW20

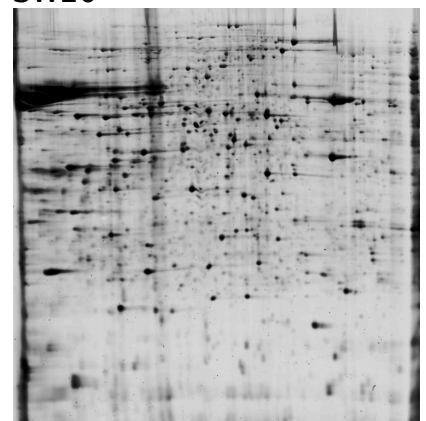

***Mytilus galloprovincialis***

VG4

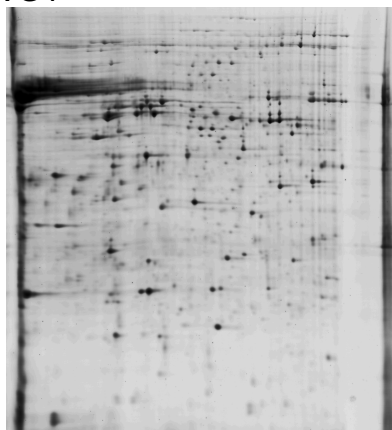

VG5

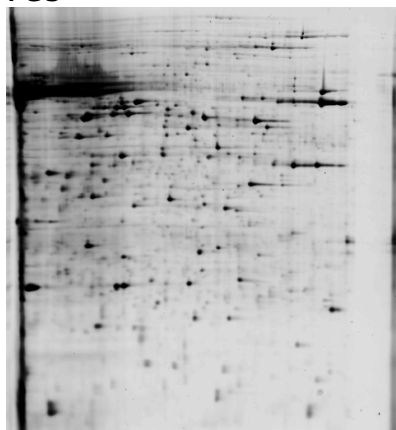

VG19

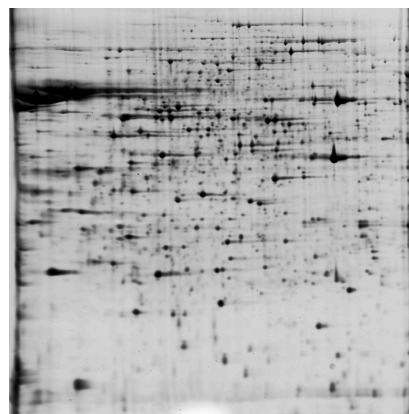

VG19\_REP

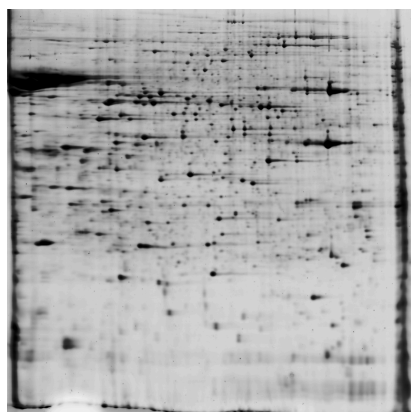

VG23

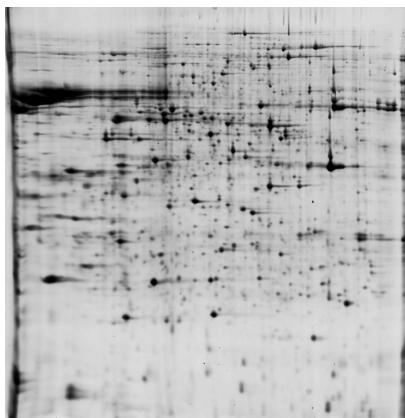

VG24

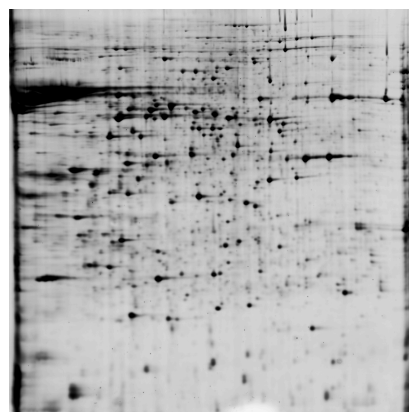

VG26

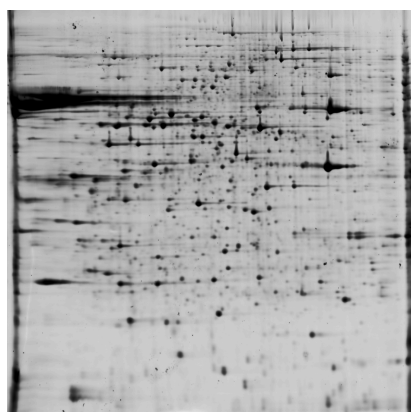

VG29

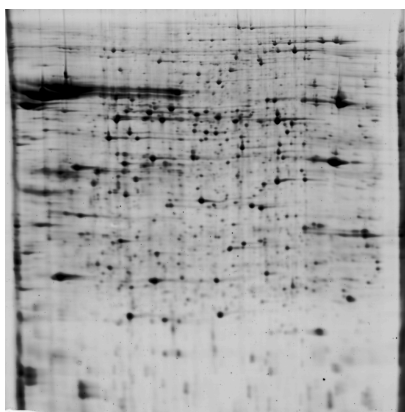

VG34

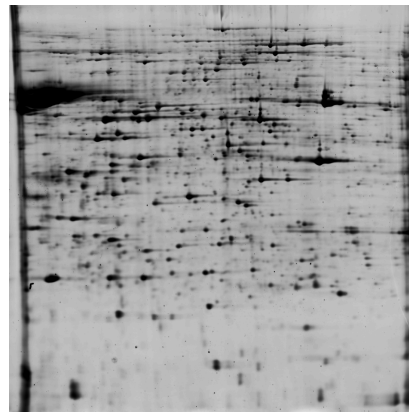

VG35

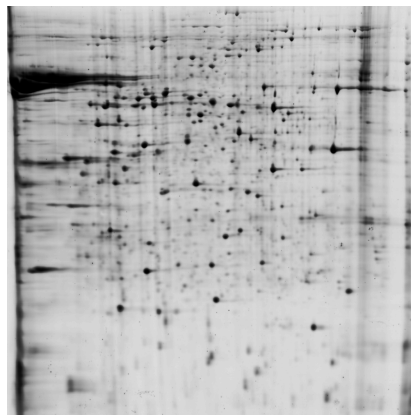

VG36

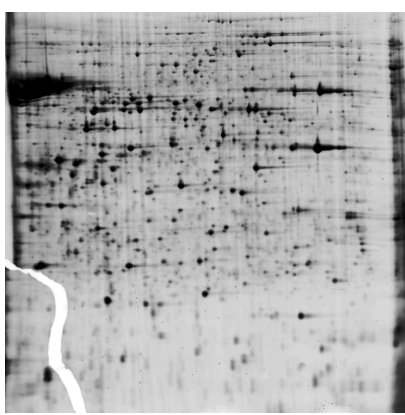

Supplement: NIHMS1509222-supplement-2.pdf [file NIHMS1509222-supplement-2.pdf]
